# Supplementary material for: Circulating microRNA Profiling Identifies a Subset of Metastatic Prostate Cancer Patients with Evidence of Cancer-Associated Hypoxia
Source: PubMed Central journal article supplement (PMC3728349; doi:10.1371/journal.pone.0069239), 2013-07-30
Supplement: pone.0069239.s005.pdf [file pone.0069239.s005.pdf]

**Supporting Table S4.** Single-plex TaqMan assays used in this study

| <u>microRNA</u> | <u>ABI Product No.</u> | <u>Assay ID No.</u> | <u>microRNA TaqMan assay target sequence or gene expression amplicon</u> |
|-----------------|------------------------|---------------------|--------------------------------------------------------------------------|
| miR-16          | 4427975                | 000391              | UAGCAGCACGUAAAUAUUGGCG                                                   |
| miR-19b         | 4427975                | 000396              | UGUGCAAUCCAUGCAAAACUGA                                                   |
| miR-24          | 4427975                | 000402              | UGGCUCAGUUCAGCAGGAACAG                                                   |
| miR-100         | 4427975                | 000437              | AACCCGUAGAUCCGAACUUGUG                                                   |
| miR-141         | 4427975                | 000463              | UACACUGUCUGGUAAAGAUGG                                                    |
| miR-148a        | 4427975                | 000470              | UCAGUGCACUACAGAACUUUGU                                                   |
| miR-200a        | 4427975                | 000502              | UACACUGUCUGGUACGAUGU                                                     |
| miR-200c        | 4427975                | 002300              | UAAUACUGCCGGUAAUGAUGGA                                                   |
| miR-210         | 4427975                | 000512              | CUGUGCGUGUGACAGCGGCUGA                                                   |
| miR-222         | 4427975                | 000525              | AGCUACAUCUGGCUACUGGGU                                                    |
| miR-375         | 4427975                | 000564              | UUUGUUCGUUCGGCUCGCGUGA                                                   |
| miR-425-5p      | 4427975                | 001516              | AAUGACACGAUCACUCCCGUUGA                                                  |
| GUSB            | 4331182                | HS00939627_m1       | not available                                                            |
| KRT18           | 4331182                | HS02827483_g1       | not available                                                            |
| RNU-24          | 4427975                | 001001              | AUUUGCUAUCUGAGAGAUGGUGAUGACAUUUUAAACCACCAAGAUCGCUGAUGCA                  |
| RNU-48          | 4427975                | 001006              | GAUGACCCAGGUAAACUCUGAGUGUGUCGCUGAUGCCAUCACCGCAGCGCUCUGACC                |

miRNA assays were designed against human miRNA sequences. Note that miRNA names and assay numbers provided are from the TaqMan qRT-PCR literature (Applied BioSystems), which uses miRNA nomenclature that predates the current miRBase release.
